# Supplementary material for: The elemental pegging effect in locally ordered nanocrystallites of high-entropy oxide enables superior lithium storage
Source: Royal Society of Chemistry journal article supplement (doi:10.1039/d3nr04006b), 2023-01-01
Supplement: d3nr04006b1.pdf [file d3nr04006b1.pdf]

## Supporting Information

### **Elemental Pegging Effect in Locally Ordered Nanocrystallites of High-Entropy Oxide Enables Superior Lithium Storage**

Huitao Leng<sup>1#</sup>, Panpan Zhang<sup>1#</sup>, Jiansheng Wu<sup>1#</sup>, Taiding Xu<sup>1</sup>, Hong Deng<sup>1</sup>, Pan Yang<sup>1,2</sup>, Shouyue Wang<sup>1</sup>, Jingxia Qiu<sup>\*1</sup>, Zhenzhen Wu<sup>\*2</sup>, Sheng Li<sup>\*1</sup>

1. School of Physical and Mathematical Sciences, Key Laboratory of Flexible Electronics (KLOFE) and Institute of Advanced Materials (IAM), Nanjing Tech University (NanjingTech), Nanjing 211816, China
2. Centre for Clean Environment and Energy, School of Environment and Science, Griffith University, Gold Coast 4222, Australia.

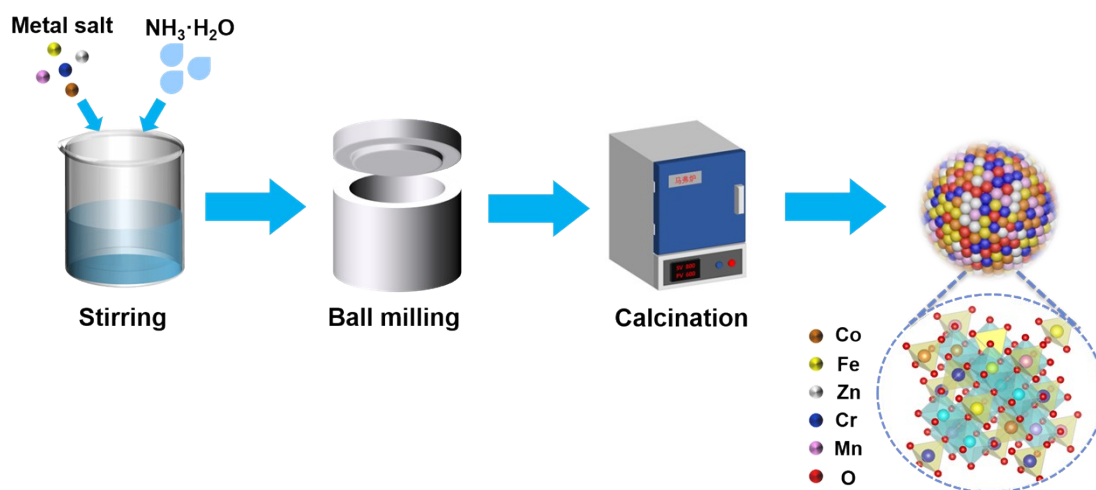

**Scheme S1.** Schematic diagram of the synthesis process of the HEO-MFCCZ

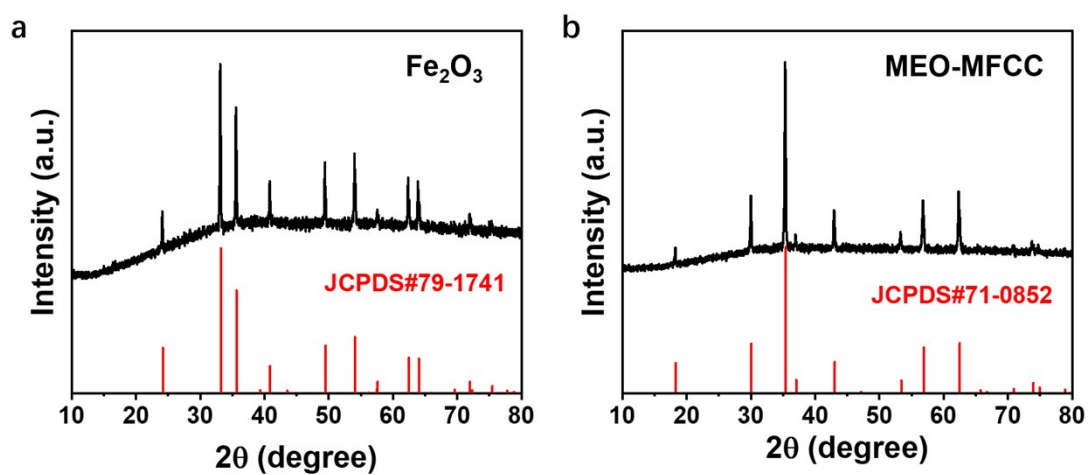

**Fig. S1.** XRD patterns of  $\text{Fe}_2\text{O}_3$  and HEO-MFCC.

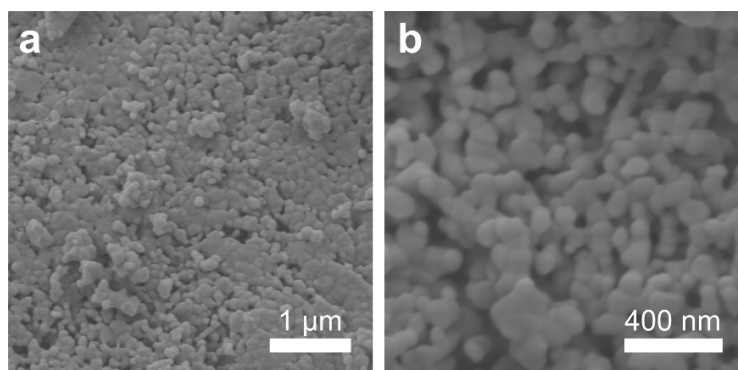

**Fig. S2.** SEM images of  $\text{Fe}_2\text{O}_3$ .

**Table S1.** ICP data for the HEO-MFCCZ and MEO-MFCC with the percentage of each element.

|           | Mn    | Fe    | Co    | Cr    | Zn    | S <sub>config</sub> |
|-----------|-------|-------|-------|-------|-------|---------------------|
| HEO-MFCCZ | 23.4% | 23%   | 21.6% | 19.2% | 12.8% | 1.58R               |
| MEO-MFCC  | 27.5% | 30.2% | 23.5% | 18.8% | --    | 1.37R               |

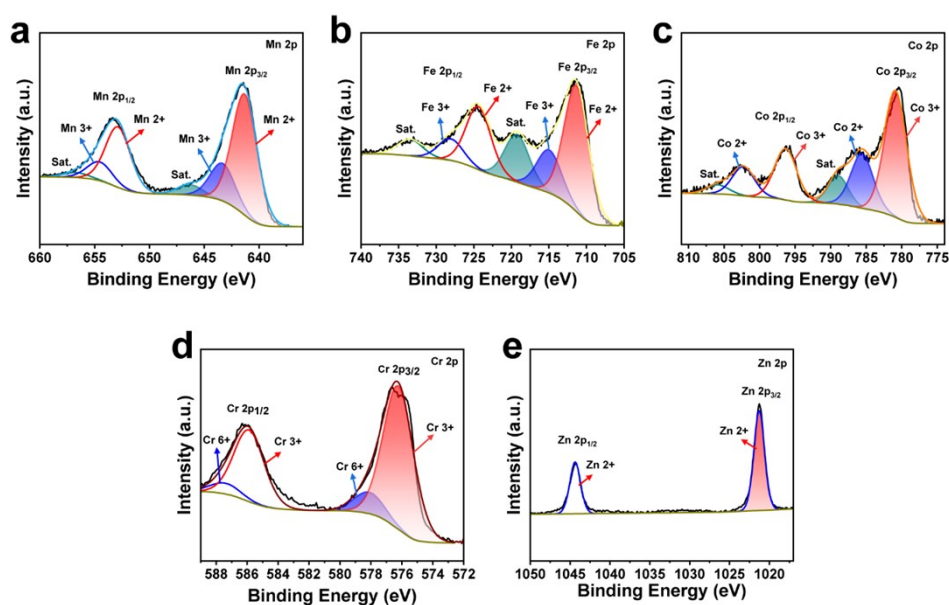

**Fig. S3.** XPS of different elements in the HEO-MFCCZ: (a) Mn; (b) Fe; (c) Co; (d) Cr; (e) Zn.

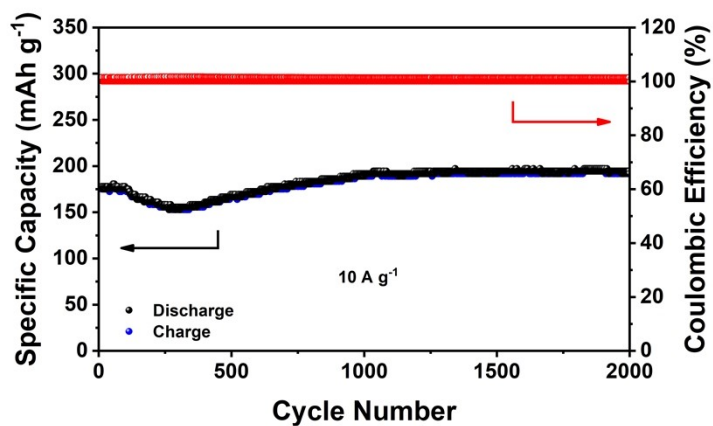

**Fig. S4.** Cyclic test of the HEO-MFCCZ electrode at a current density of  $10 \text{ A g}^{-1}$

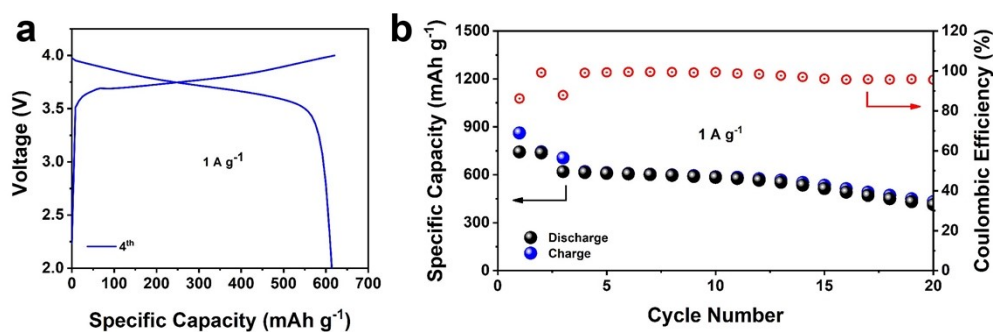

**Fig. S5.** Cyclic test of full battery at a current density of  $1 \text{ A g}^{-1}$

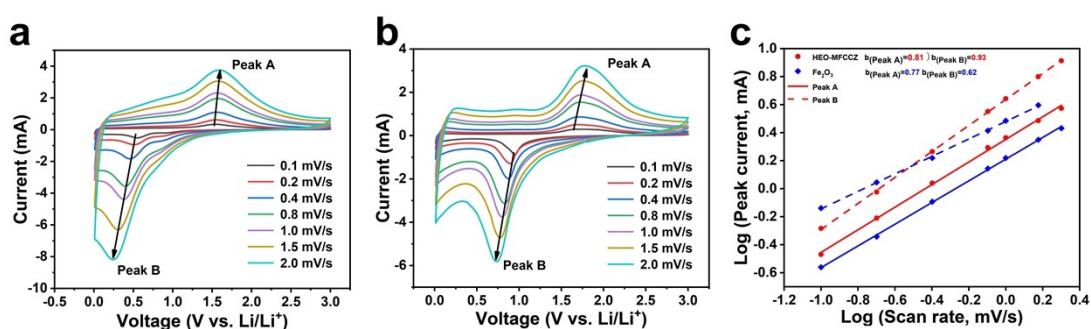

**Fig. S6.** CV curves at different scan rates: (a) HEO-MFCCZ ; (b)  $\text{Fe}_2\text{O}_3$ ; (c) The comparison of b values of two materials.

**Table S2.** Comparison of the main parameters of the HEO-MFCCZ in this work with other HEO-related working symmetric cells.

| Composition                                                                             | Crystal Structure | Rate capacity                                    | Cycle performance (cycles)                                | Electrolyte                                     | Ref          |
|-----------------------------------------------------------------------------------------|-------------------|--------------------------------------------------|-----------------------------------------------------------|-------------------------------------------------|--------------|
| $(\text{MgCoNiCuZn})\text{O}$                                                           | Rock salt         | $180 \text{ mAh g}^{-1}$ at $3 \text{ A g}^{-1}$ | $590 \text{ mAh g}^{-1}$ at $0.2 \text{ A g}^{-1}$ (300)  | 1 M $\text{LiPF}_6$ in EC:EMC = 1:1 (vol)       | <sup>1</sup> |
| $(\text{MgCoNiZn})_{0.65}\text{Li}_{0.35}\text{O}$                                      | Rock salt         | $680 \text{ mAh g}^{-1}$ at $1 \text{ A g}^{-1}$ | $610 \text{ mAh g}^{-1}$ at $1 \text{ A g}^{-1}$ (100)    | 1 M $\text{LiPF}_6$ in EC:DMC = 1:1 (vol)       | <sup>2</sup> |
| $(\text{Mg}_{0.2}\text{Co}_{0.2}\text{Ni}_{0.2}\text{Cu}_{0.2}\text{Zn}_{0.2})\text{O}$ | Rock salt         | $206 \text{ mAh g}^{-1}$ at $2 \text{ A g}^{-1}$ | $390 \text{ mAh g}^{-1}$ at $500 \text{ mA g}^{-1}$ (300) | 1 M $\text{LiPF}_6$ in EC:DEC:DMC = 1:1:1 (vol) | <sup>3</sup> |
| $(\text{LiMgCoNiCuZn})\text{O}$                                                         | Rock salt         | $455 \text{ mAh g}^{-1}$ at $2 \text{ A g}^{-1}$ | $417 \text{ mAh g}^{-1}$ at $1 \text{ A g}^{-1}$ (300)    | 1 M $\text{LiPF}_6$ in EC:DMC:EMC               | <sup>4</sup> |

|                                                                                                                               |        |                                                                                                      |                                                            |                                                              |                  |
|-------------------------------------------------------------------------------------------------------------------------------|--------|------------------------------------------------------------------------------------------------------|------------------------------------------------------------|--------------------------------------------------------------|------------------|
|                                                                                                                               |        |                                                                                                      |                                                            | =                                                            |                  |
|                                                                                                                               |        |                                                                                                      |                                                            | 1:1:1 (vol)                                                  |                  |
| (FeNiCrMnZn) <sub>3</sub> O <sub>4</sub>                                                                                      | Spinel | 382 mAh g <sup>-1</sup> at 1 A g <sup>-1</sup>                                                       | 387 mAh g <sup>-1</sup><br>at 500 mA g <sup>-1</sup> (185) | 1M LiPF <sub>6</sub> in<br>EC:DEC=1:1<br>(vol)               | <sup>5</sup>     |
| (FeCoNiCrMnZnLi) <sub>3</sub> O <sub>4</sub>                                                                                  | Spine  | 250 mAsh g <sup>-1</sup> at 1 A g <sup>-1</sup><br>1                                                 | 522 mAh g <sup>-1</sup><br>at 500 mA g <sup>-1</sup> (100) | 1 M LiPF <sub>6</sub> in<br>EC:DEC:EMC<br>=                  | <sup>6</sup>     |
|                                                                                                                               |        |                                                                                                      |                                                            | 1:1:1 (vol)                                                  |                  |
| (FeCoNiCrMn) <sub>3</sub> O <sub>4</sub>                                                                                      | Spinel | 423 mAh g <sup>-1</sup> at 1 A g <sup>-1</sup>                                                       | 220 mAh g <sup>-1</sup><br>at 5 A g <sup>-1</sup> (5000)   | 1 M LiPF <sub>6</sub> in<br>EC:PC =<br>1:1 (vol)             | <sup>7</sup>     |
| (CrNiMnFeCu) <sub>3</sub> O <sub>4</sub>                                                                                      | Spinel | 480 mAh g <sup>-1</sup> at 2 A g <sup>-1</sup>                                                       | 600 mAh g <sup>-1</sup><br>at 500 mA g <sup>-1</sup> (500) | 1M LiPF <sub>6</sub> in<br>EC:DEC=1:1<br>(vol) with<br>5%FEC | <sup>8</sup>     |
| (Mn <sub>0.23</sub> Fe <sub>0.23</sub> Co <sub>0.22</sub> Cr <sub>0.19</sub> Zn <sub>0.13</sub> ) <sub>3</sub> O <sub>4</sub> | Spinel | 590 mAh g <sup>-1</sup> at 2 A g <sup>-1</sup><br>and 680 mAh g <sup>-1</sup> at 1 A g <sup>-1</sup> | 620 at 2 A g <sup>-1</sup> (550)                           | 1M LiPF <sub>6</sub> in<br>EC:DEC=1:1<br>(vol) with<br>5%FEC | <b>This work</b> |

**Table S3.** Results of XPS data with the elemental valence changes of the HEO-MFCCZ

| Results of the elemental valence changes of the HEO-MFCCZ |                  |                  |                  |                  |                  |                  |                  |                  |                  |                  |
|-----------------------------------------------------------|------------------|------------------|------------------|------------------|------------------|------------------|------------------|------------------|------------------|------------------|
|                                                           | Fe               |                  |                  | Mn               |                  | Co               |                  | Cr               |                  |                  |
|                                                           | Fe <sup>0+</sup> | Fe <sup>2+</sup> | Fe <sup>3+</sup> | Mn <sup>2+</sup> | Mn <sup>3+</sup> | Co <sup>2+</sup> | Co <sup>3+</sup> | Cr <sup>0+</sup> | Cr <sup>3+</sup> | Cr <sup>6+</sup> |
| <b>0.01 V</b>                                             | 10               | 60               | 30               | 80               | 20               | 47               | 53               | 73               | 27               | 0                |
| <b>3 V</b>                                                | 9                | 51               | 39               | 69               | 31               | 23               | 67               | 56               | 44               | 0                |

### Annotation

The crystal structures in this work (**Fig. 1** and **Scheme S1**) were drawn through Vesta [9].

1. A. Sarkar, L. Velasco, D. Wang, Q. Wang, G. Talasila, L. de Biasi, C. Kübel, T. Brezesinski, S. S. Bhattacharya and H. Hahn, *Nature communications*, 2018, **9**, 3400.
2. Q. Zhao, A. Song, W. Zhao, R. Qin, S. Ding, X. Chen, Y. Song, L. Yang, H. Lin, S. Li and F. Pan, *Angew Chem Int Ed Engl*, 2021, **60**, 4169–4174.
3. C. Triolo, W. Xu, B. Petrovičová, N. Pinna and S. Santangelo, *Advanced Functional Materials*, 2022, **32**.
4. X. Liu, Y. Xing, K. Xu, H. Zhang, M. Gong, Q. Jia, S. Zhang and W. Lei, *Small*, 2022, **18**, 2200524.
5. B. Xiao, G. Wu, T. Wang, Z. Wei, Y. Sui, B. Shen, J. Qi, F. Wei, Q. Meng, Y. Ren, X. Xue, J. Zheng, J. Mao and K. Dai, *Ceramics International*, 2021, **47**, 33972–33977.
6. C. Duan, K. Tian, X. Li, D. Wang, H. Sun, R. Zheng, Z. Wang and Y. Liu, *Ceramics International*, 2021, **47**, 32025–32032.
7. Z. Sun, Y. Zhao, C. Sun, Q. Ni, C. Wang and H. Jin, *Chemical Engineering Journal*, 2022, **431**.
8. J. Patra, T. X. Nguyen, C. C. Tsai, O. Clemens, J. Li, P. Pal, W. K. Chan, C. H. Lee, H. Y. T. Chen and J. M. Ting, *Advanced Functional Materials*, 2022, **32**, 2110992.
9. K. Momma and F. Izumi, *Journal of Applied Crystallography*, 2011, **44**, 1272–1276.
